# Supplementary material
Source: PubMed Central journal article supplement (PMC2141836)
Supplement: pnas_0707120104_1.pdf [file pnas_0707120104_1.pdf]

|        |     |                                                                                    |
|--------|-----|------------------------------------------------------------------------------------|
| HsNHA1 | 1   | MHTTESKNEHLEDENFQSTSTPQSLIDPNNTAHEETKTVLSDTFEIKPQT-----KKETYIS                     |
| HsNHA2 | 1   | ---MGDEDKRITYEDSEPSTGMNYTPSMHQEAQEETVMKLGIDANEPTEGSILLKSSEKKLQETPTEANHVQRLRQMLA    |
| HsNHA1 | 58  | CPLRGVNLNVIITNGVILFVIWCMTWSILGSEALPGGNLFGFLFIIFYSAIIGGKILQLIRIPLVPPLPPLLGMLLAGFTIR |
| HsNHA2 | 78  | CPPHGLLDRVITNVTIIVLLWAVVWSITGSECLPGGNLFGIILFYCAIIGGKLLGLIKLPTLPPLPSLLGMLLAGFLIR    |
| HsNHA1 | 138 | NVPFINEHVVHPNTWSSILRSIALTIILIRAGLGDPQALRHLKVVCFRLAVGPCLEASAAAVFSHFIMKFPWQWAFLL     |
| HsNHA2 | 158 | NIPVINDNVQIKHKWSSSLRSIALSIILVRAGLGDSKALKKLGVCVRLSMGPCIVEACTSALLAHYLLGLPWQWGFLL     |
| HsNHA1 | 218 | GFVLGAVSPAVVVPYMMVLQENGYGVEEGIPTLLMAASSMDDILAITGFNTCLSIVFSSGGIILNNAIASIRNVCLISLLAG |
| HsNHA2 | 238 | GFVLGAVSPAVVVP SMLLLQGGGYGVEKGVPTLLMAAGSFDDILAITGFNTCLGIAFSTGSTVFNVLRGVLEVVIGVATG  |
| HsNHA1 | 298 | IVLGFFVRYFPSEDQKKLTLKRGFLVLTMCVSAVLGSQRIGLHGSGGLCTLVLSFIAGTKWSQEKMKVQKIITTVWDIFQ   |
| HsNHA2 | 318 | SVLGFFIQYFPSRDQDKLVCKRTLFLVLGLSVLAVFSSVHFGFPGSGGLCTLVMAFLAGMGWTSSEKAEVEKIIAVAWDIFQ |
| HsNHA1 | 378 | PLLFGLVGAEVSVSSLESNIVGISVATLSLALCVRILTYYLLMCFAGEFSFKEKIFIALAWMPKATVQAVLGPPLALETARV |
| HsNHA2 | 398 | PLLFGLIGAEVSIASLRPETVGLCVATVGIAVLIRILTTFELMVCFAGENLKEKIFISFAWLPKATVQAAIGSVALDTARS  |
| HsNHA1 | 458 | SAP-HLEPYAKDVMTVAFLAAILITAPNGALLMGILGPKMLTRHYDPSKIKLQQLSTLEHH-                     |
| HsNHA2 | 478 | HGEKQLEDYGMVLTVAFLSILITAPIGSLIIGLLGPRLLQKVEHQNKDEEVQGETSVQV                        |
