# Supplementary material
Source: PubMed Central journal article supplement (PMC2141836)

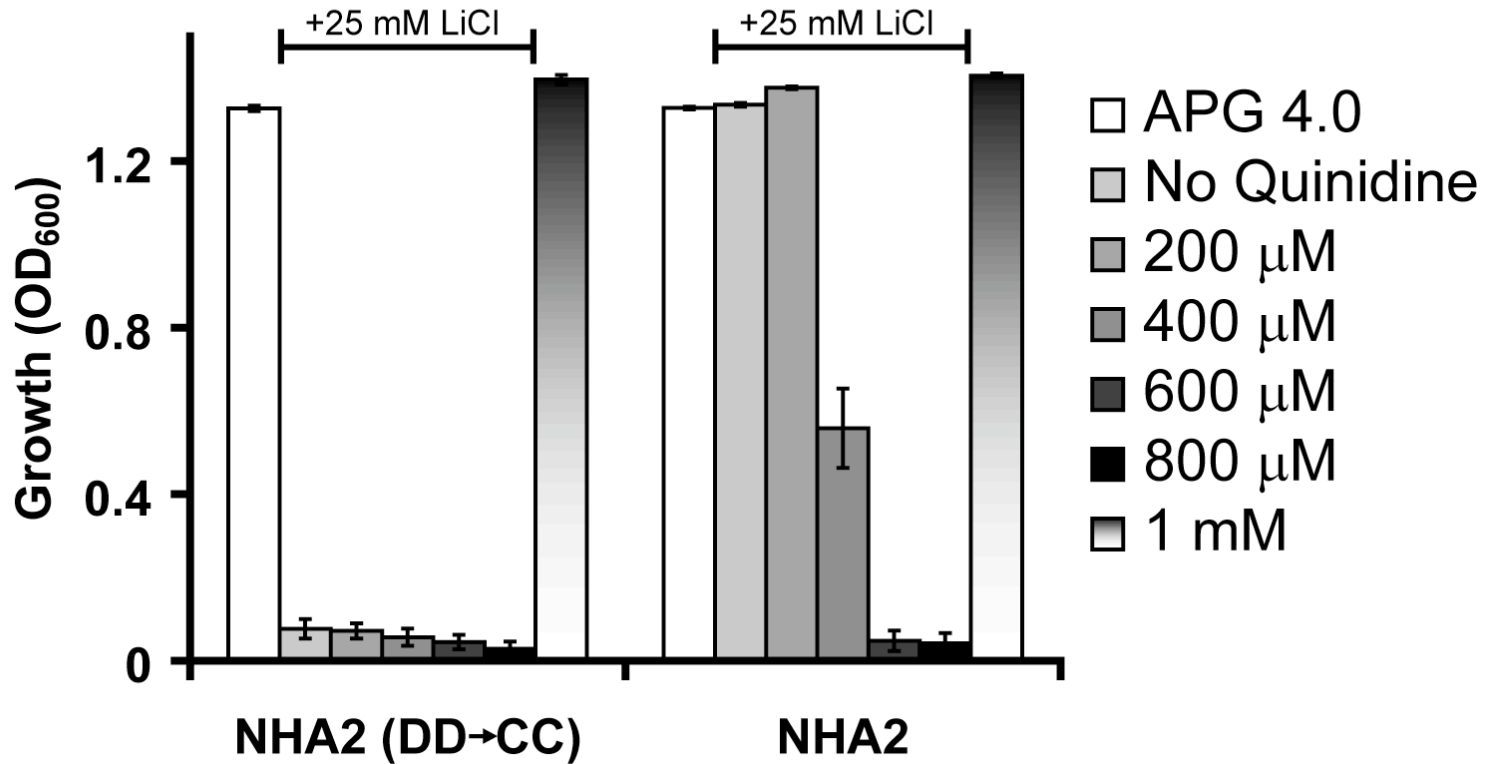

Supplement: pnas_0707120104_2.pdf [file pnas_0707120104_2.pdf]
